# Supplementary material for: Computer aided epitope design as a peptide vaccine component against Lassa virus
Source: PubMed Central journal article supplement (PMC5767920; doi:10.6026/97320630013417), 2017-12-31
Supplement: 97320630013417S1.pdf [file 97320630013417S1.pdf]

## Supplementary Material:

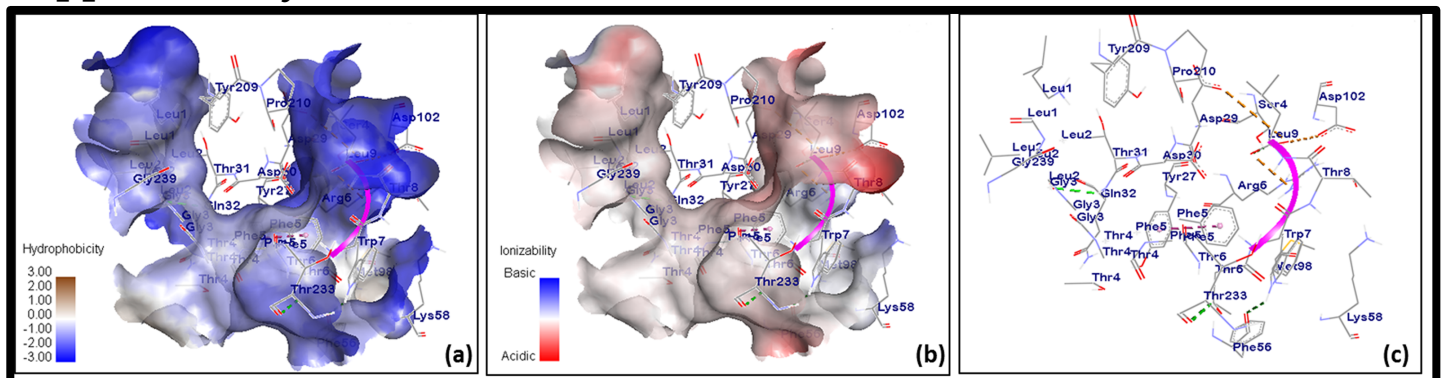

**Figure S1:** (a) Hydrophobic receptor surface of HLA-A\*02:01 (PDB ID: 3UTQ) and the 'LLGTFWTWL' ligand interaction (b) Ionizable receptor surface of HLA-A\*02:01 (PDB ID: 3UTQ) and the interaction of 'LLGTFWTWL' ligand and (c) Non-bond interaction between HLA-A\*02:01 (PDB ID: 3UTQ) and 'LLGTFWTWL' ligand.

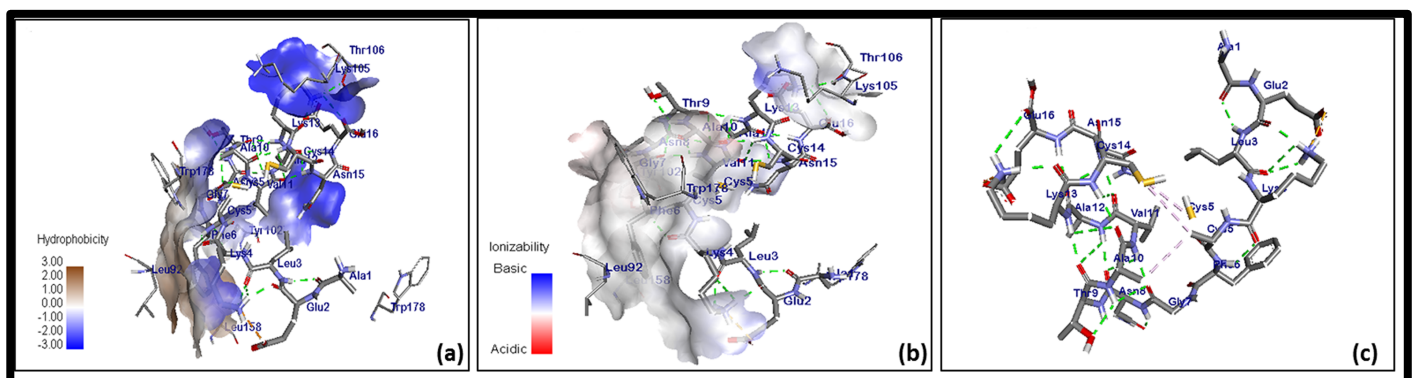

**Figure S2:** (a) Hydrophobic receptor surface of HLA-DRB1\*01:01 (PDB ID: 1AQD) and the 'AELKCFGNTAVAKCNE' ligand interaction (b) Ionizable receptor surface of HLA-DRB1\*01:01 (PDB ID: 1AQD) and the interaction of 'AELKCFGNTAVAKCNE' ligand and (c) Non-bonded interaction between HLA-DRB1\*01:01 (PDB ID: 1AQD) and the 'AELKCFGNTAVAKCNE' ligand.

**Table S1:** Glycoprotein sequences from different strains of LASV at different time frame in different endemic regions

| LASV glycoprotein sequences        | Accession number |
|------------------------------------|------------------|
| LASVGP_1987                        | AAA46283.1       |
| LASVGP_1989                        | AAA46286.1       |
| LASVGP_Josiah_Sep2002              | NP_694870.1      |
| LASVGP_Josiah_Dec2010              | ADY11068.1       |
| LASVGP_recombinant_Josiah_Dec2010  | ADY11070.1       |
| LASVGP_Josiah_Aug2011_Sierra Leone | AEY85213.1       |
| LASVGP_Josiah_Jan2017_Sierra Leone | APT69664.1       |
| LASVGP_Josiah_Jan2017_Sierra Leone | APT69609.1       |
| LASVGP_Jan2017_Guinea              | APT69607.1       |
| LASVGP_Josiah_Jan2017_Sierra Leone | APT69605.1       |
| LASVGP_Josiah_Jan2017_Sierra Leone | APT69592.1       |
| LASVGP_Jan2017_Guinea              | APT69572.1       |

**Table S2:** Transmembrane topology analysis of LASV glycoprotein conserved regions using TMHMM v2.0 server

| Conserved regions | Nature                         |
|-------------------|--------------------------------|
| 1-27              | Inner membrane + Transmembrane |
| 29-37             | Transmembrane                  |
| 59-131            | Outer membrane                 |
| 133-173           | Outer membrane                 |
| 175-220           | Outer membrane                 |
| 222-375           | Outer membrane                 |
| 380-409           | Outer membrane                 |
| 411-427           | Outer membrane                 |
| 428-461           | Inner + Transmembrane          |
| 463-478           | Inner membrane                 |

**Table S3:** Results from non-glycosylated T-cell epitope prediction with MHC class I binding score, processing score, proteasomal cleavage score, TAP score interaction along with super-type information is shown.

| Sequence   | MHC super-type | MHC score | processing score | proteasomal cleavage score | TAP score | Total score |
|------------|----------------|-----------|------------------|----------------------------|-----------|-------------|
| ITEMLQKEY  | A1             | 0.5415    | 2.2993           | 0.9549                     | 2.818     | 2.5834      |
|            | B62            | 0.2637    | 0.5234           | 0.9549                     | 2.818     | 0.8076      |
| LSIPNFNQY  | A1             | 0.3242    | 1.3764           | 0.9728                     | 3.015     | 1.6731      |
|            | A26            | 0.3454    | 0.927            | 0.9728                     | 3.015     | 1.2237      |
|            | B58            | 0.4724    | 1.0647           | 0.9728                     | 3.015     | 1.3614      |
|            | B62            | 0.4597    | 0.9126           | 0.9728                     | 3.015     | 1.2093      |
| LSQRTRDIY  | A1             | 0.2816    | 1.1957           | 0.3009                     | 2.985     | 1.3901      |
|            | B62            | 0.3411    | 0.6772           | 0.3009                     | 2.985     | 0.8716      |
| NWDCIMTSY  | A1             | 0.2562    | 1.0876           | 0.8691                     | 3.002     | 1.368       |
| FSRPSPIGY  | A1             | 0.2354    | 0.9996           | 0.7407                     | 2.87      | 1.2542      |
|            | B58            | 0.3128    | 0.705            | 0.7407                     | 2.87      | 0.9596      |
|            | B62            | 0.5028    | 0.9981           | 0.7407                     | 2.87      | 1.2527      |
| LRDIMGIPY  | A1             | 0.214     | 0.9087           | 0.9175                     | 2.936     | 1.1931      |
|            | B27            | 0.2951    | 0.7845           | 0.9175                     | 2.936     | 1.0689      |
| MRMAWGGSY  | A1             | 0.1321    | 0.5611           | 0.8509                     | 3.138     | 0.8456      |
|            | B27            | 0.5452    | 1.4493           | 0.8509                     | 3.138     | 1.7339      |
|            | B62            | 0.4623    | 0.9178           | 0.8509                     | 3.138     | 1.2023      |
| SLYKGVYEL  | A2             | 0.7619    | 1.1357           | 0.9778                     | 1.224     | 1.3435      |
|            | B39            | 0.3597    | 1.1517           | 0.9778                     | 1.224     | 1.3596      |
|            | B62            | 0.2898    | 0.5752           | 0.9778                     | 1.224     | 0.7831      |
| LLGTFTWTL  | A2             | 0.7622    | 1.1362           | 0.9783                     | 0.947     | 1.3303      |
| RMAWGGSYI  | A2             | 0.6266    | 0.934            | 0.9571                     | 0.953     | 1.1252      |
|            | B62            | 0.4864    | 0.9656           | 0.9571                     | 0.953     | 1.1568      |
| RLDFDNKQA  | A2             | 0.5849    | 0.8719           | 0.8557                     | -0.112    | 0.9946      |
| CIMTSYQYL  | A2             | 0.5237    | 0.7806           | 0.1666                     | 0.968     | 0.854       |
| IISTFHLSI  | A2             | 0.4681    | 0.6978           | 0.6683                     | 0.736     | 0.348       |
| ALINDQLIM  | A2             | 0.4559    | 0.6796           | 0.7948                     | 0.678     | 0.8327      |
|            | A26            | 0.2836    | 0.7611           | 0.7948                     | 0.678     | 0.9143      |
|            | B62            | 0.3129    | 0.6213           | 0.7948                     | 0.678     | 0.7744      |
| MAWGGSYIA  | A2             | 0.4616    | 0.688            | 0.8474                     | -0.132    | 0.8086      |
| RLLGTFTWT  | A2             | 0.4924    | 0.734            | 0.5216                     | -0.292    | 0.7977      |
| MTMPLSCTK  | A3             | 0.6468    | 1.2174           | 0.9195                     | 0.696     | 1.3901      |
| MLRLDFNFK  | A3             | 0.5932    | 1.1164           | 0.8549                     | 0.441     | 1.2667      |
| LINDQLIMK  | A3             | 0.5415    | 1.0191           | 0.7773                     | 0.657     | 1.1686      |
| QMSIQLINK  | A3             | 0.5685    | 1.0699           | 0.3017                     | 0.749     | 1.1526      |
| RTRDIYISR  | A3             | 0.4475    | 0.8422           | 0.6413                     | 1.707     | 1.0238      |
| MLQKEYMER  | A3             | 0.3859    | 0.7262           | 0.9385                     | 1.352     | 0.9346      |
| LMSIISTFH  | A3             | 0.424     | 0.798            | 0.0903                     | -0.26     | 0.7986      |
| QYEAMSCDF  | A24            | 0.577     | 1.2286           | 0.6609                     | 2.809     | 1.4682      |
| VYELQTLEL  | A24            | 0.5585    | 1.1893           | 0.9583                     | 1.107     | 1.3877      |
|            | B39            | 0.2581    | 0.8262           | 0.9583                     | 1.107     | 1.0246      |
| RWMLIEAEL  | A24            | 0.9396    | 1.1489           | 0.9371                     | 1.52      | 1.3655      |
| TFHLSIPNF  | A24            | 0.5158    | 1.0982           | 0.4659                     | 2.765     | 1.3064      |
| GYCLTRWML  | A24            | 0.4916    | 1.0467           | 0.5185                     | 1.019     | 1.1755      |
| EFCDFMLRLF | A24            | 0.4277    | 0.9107           | 0.1669                     | 2.34      | 1.0527      |
|            | A26            | 0.4232    | 1.1357           | 0.1669                     | 2.34      | 1.2777      |
| AWGGSYIAL  | A24            | 0.3554    | 0.7567           | 0.8072                     | 1.218     | 0.9387      |
| EGKDTPGGY  | A26            | 0.5752    | 1.5435           | 0.9526                     | 2.5060    | 1.8117      |
| DCIMTSYQY  | A26            | 0.5009    | 1.3442           | 0.2989                     | 0.185     | 1.3983      |
| TTWEDHCQF  | A26            | 0.1784    | 0.4788           | 0.9761                     | 2.805     | 0.7654      |
| SPIGYLGLL  | B58            | 0.5342    | 1.2039           | 0.9761                     | 2.805     | 1.4906      |
| ISRRLLGTF  | B8             | 0.3758    | 1.2834           | 0.8407                     | -0.075    | 1.4058      |
| LINKAVNAL  | B7             | 0.3062    | 0.5907           | 0.782                      | 0.944     | 0.7552      |
|            | B8             | 0.2316    | 0.7908           | 0.374                      | 2.595     | 0.9766      |
| YISRRLLGT  | B8             | 0.2604    | 0.8894           | 0.0430                     | -0.592    | 0.8662      |
| RRLGTFFTW  | B58            | 0.3064    | 0.6906           | 0.9146                     | 1.0960    | 0.8826      |
| SIQLINKAV  | B8             | 0.1972    | 0.6733           | 0.4906                     | 0.5       | 0.7719      |
|            | B27            | 0.5307    | 1.4109           | 0.9784                     | 1.409     | 1.628       |
| QRLKAEAQM  | B27            | 0.5114    | 1.3594           | 0.8823                     | 0.551     | 1.5192      |
| KHDEEFCDM  | B44            | 0.2765    | 0.6853           | 0.1647                     | 0.944     | 0.7572      |

|           |     |        |        |        |       |        |
|-----------|-----|--------|--------|--------|-------|--------|
| TLELNMETL | B44 | 0.6825 | 1.6912 | 0.3874 | 0.745 | 1.7866 |
| HDEEFCMDL | B39 | 0.256  | 0.8197 | 0.6187 | 0.513 | 0.9381 |
|           | B39 | 0.21   | 0.6725 | 0.9134 | 0.76  | 0.8475 |
| AEAQMSIQL | B39 | 0.2054 | 0.6577 | 0.3779 | 1.081 | 0.7684 |
| EEFCMDLRL | B44 | 0.747  | 1.8512 | 0.3779 | 1.081 | 1.9619 |
| RDIYISRR  | B44 | 0.3093 | 0.7664 | 0.4343 | 0.97  | 0.88   |
| TEMLQKEYM | B44 | 0.2782 | 0.6895 | 0.609  | 0.222 | 0.792  |
| VANGVLQTF | B62 | 0.3842 | 0.7628 | 0.9593 | 0.904 | 0.9519 |
| MSIISTFHL | B58 | 0.6342 | 1.4293 | 0.9397 | 1.159 | 1.6282 |
|           | B58 | 0.5985 | 1.3489 | 0.9048 | 2.565 | 1.6128 |
| LQTFMRMAW | B62 | 0.4276 | 0.8488 | 0.2256 | 2.72  | 1.0186 |
| SQRTRDIYI | B62 | 0.3315 | 0.6581 | 0.5659 | 0.76  | 0.781  |

**Table S4:** HLA class I specific T-cell epitopes with antigenicity score having IC<sub>50</sub> < 250 nM.

| Sequence   | Antigenicity score | HLA class I alleles                                                                                    |
|------------|--------------------|--------------------------------------------------------------------------------------------------------|
| LLGTFTWTL  | 0.41022            | HLA-A*02:01, HLA-C*12:03, HLA-C*03:03, HLA-B*15:02                                                     |
| RLLGFTFTWT | 0.34068            | HLA-C*03:03, HLA-C*12:03, HLA-C*14:02, HLA-A*02:06                                                     |
| KHDEEFCDM  | 0.28311            | HLA-C*12:03, HLA-C*05:01, HLA-C*14:02, HLA-C*07:02                                                     |
| RWMLIEAEL  | 0.24721            | HLA-C*12:03, HLA-C*03:03, HLA-C*14:02                                                                  |
| SQRTRDIYI  | 0.2373             | HLA-C*12:03, HLA-A*30:01                                                                               |
| GYCLTRWML  | 0.1422             | HLA-C*14:02, HLA-C*07:02, HLA-C*12:03, HLA-B*15:02, HLA-C*03:03, HLA-A*23:01                           |
| HDEEFCMDL  | 0.11262            | HLA-C*12:03, HLA-C*07:02, HLA-B*15:02, HLA-C*05:01                                                     |
| TTWEDHCQF  | 0.11152            | HLA-C*14:02, HLA-A*32:01, HLA-C*03:03, HLA-C*12:03                                                     |
| LRDIMGIPY  | 0.10786            | HLA-C*12:03, HLA-C*14:02, HLA-C*08:02                                                                  |
| MLRLDFDNK  | 0.23554            | HLA-C*12:03, HLA-A*30:01, HLA-C*12:03, HLA-A*03:01, HLA-A*31:01, HLA-A*11:01, HLA-A*68:01              |
| MRMAWGGSY  | 0.16191            | HLA-C*12:03, HLA-C*06:02, HLA-C*07:01, HLA-C*14:02, HLA-B*15:02, HLA-B*27:05, HLA-A*30:02, HLA-A*29:02 |
| RMAWGGSYI  | 0.15871            | HLA-C*03:03, HLA-A*02:01, HLA-C*12:03, HLA-C*14:02, HLA-B*15:02, HLA-A*02:06, HLA-A*32:01              |
| LMSIISTFH  | 0.15525            | HLA-C*03:03, HLA-C*12:03, HLA-C*14:02                                                                  |
| RRLLGFTFTW | 0.17626            | HLA-C*12:03, HLA-A*32:01, HLA-B*58:01, HLA-C*03:03, HLA-B*27:05, HLA-C*07:02                           |
| MSIISTFHL  | 0.17026            | HLA-B*15:02, HLA-B*58:01, HLA-A*68:02, HLA-C*12:03, HLA-C*03:03, HLA-A*02:06                           |
| LSQRTRDIY  | 0.19748            | HLA-C*12:03, HLA-C*03:03, HLA-B*15:02, HLA-C*14:02, HLA-A*30:02                                        |
| RTRDIYISR  | 0.1809             | HLA-A*31:01, HLA-A*30:01, HLA-C*12:03, HLA-C*14:02, HLA-A*68:01                                        |

**Table S5:** Results from non-glycosylated B-cell epitope prediction using the ABCpred server v2.0. Antigenicity and hydrophilicity were calculated using the IEDB antigen sequence properties tool.

| Rank | Sequence          | Starting number | ABCpred Score | Antigenicity (IEDB) | Hydrophilicity (IEDB) |
|------|-------------------|-----------------|---------------|---------------------|-----------------------|
| 01   | AELKCFGNTAVAKCNE  | 288             | 0.95          | 1.04                | 2.431                 |
| 02   | DQLIMKNHLRDMGIP   | 347             | 0.90          | 0.999               | 0.125                 |
| 03   | LSDSEGKDTGGYCLT   | 266             | 0.90          | 1.007               | 3.375                 |
| 04   | TEMLQKEYMERQKTP   | 412             | 0.89          | 0.946               | 3.106                 |
| 05   | EEFCMDLRLDFDNKQA  | 307             | 0.88          | 1.006               | 0.738                 |
| 06   | WGGSYIALDSGRGNWD  | 196             | 0.87          | 0.957               | 1.875                 |
| 07   | HLSIPNFNQYEAMSCD  | 141             | 0.87          | 1.027               | 1.625                 |
| 08   | LGFTFTWLSDSEGKDT  | 259             | 0.83          | 0.963               | 2.569                 |
| 09   | TFMRMAWGGSYIALDS  | 190             | 0.83          | 0.984               | 0.081                 |
| 10   | MSIISTFHLSIPNFNQ  | 134             | 0.83          | 1.025               | -0.431                |
| 11   | AEAQMSIQLINKAVNA  | 328             | 0.82          | 1.025               | 1.331                 |
| 12   | QRTRDIYISRRLLGTF  | 247             | 0.81          | 1.008               | 0.619                 |
| 13   | TAVAKCNEKHDEEFCD  | 296             | 0.80          | 1.023               | 3.95                  |
| 14   | KDTPGGYCLTRWMLIE  | 272             | 0.78          | 1.006               | 0.656                 |
| 15   | YISRRLLGFTFTWLS   | 253             | 0.76          | 1.018               | -0.25                 |
| 16   | CLTRWMLIEAELKCFG  | 279             | 0.75          | 1.055               | -1.106                |
| 17   | DHCQFSRPSPIGYLGL  | 229             | 0.75          | 1.067               | 0.925                 |
| 18   | NQYEAMSCDFNGGKIS  | 148             | 0.73          | 0.981               | 3.006                 |
| 19   | PLSCTKNNSHHYIMVG  | 83              | 0.65          | 1.047               | 1.519                 |
| 20   | DFNKQAIQRLKAEAMQ  | 317             | 0.63          | 0.986               | 2.131                 |
| 21   | RPSPIGYLGLLSQRTR  | 235             | 0.62          | 1.032               | 0.931                 |
| 22   | YKGVYELQTLLELNMET | 62              | 0.55          | 1.015               | 1.181                 |

**Table S6:** MHC class II specific B-cell epitopes having predicted IC<sub>50</sub> less than 250 nM is listed.

| Sequence         | MHC II HLA                                                                |
|------------------|---------------------------------------------------------------------------|
| AELKCFGNTAVAKCNE | HLA-DRB1*07:01, HLA-DRB1*01:01, HLA-DRB1*04:04, HLA-DQA1*05:01/DQB1*03:01 |

|                   |                                                                                      |
|-------------------|--------------------------------------------------------------------------------------|
| LSDSEGKDTPGGYCLT  | Nil                                                                                  |
| HLSIPNFNQYEAMSCD  | HLA-DRB1*01:01                                                                       |
| AEAQMSIQLINKAVNA  | HLA-DRB4*01:01, HLA-DRB1*01:01, HLA-DRB1*04:04, HLA-DRB1*11:01                       |
| PLSCTKNNSSHYYIMVG | Nil                                                                                  |
| YKGVYELQTLLELNMET | HLA-DRB1*01:01, HLA-DRB1*04:05, HLA-DPA1*02:01/DPB1*01:01, HLA-DPA1*03:01/DPB1*04:02 |
| TAVAKCNEKHDEEFCF  | Nil                                                                                  |

**Table S7:** Population coverage of class I MHC specific T-cell epitopes

| Population/area | Class I  |             |      |
|-----------------|----------|-------------|------|
|                 | Coverage | Average hit | pc90 |
| Central Africa  | 18.78%   | 0.36        | 0.12 |
| East Africa     | 23.39%   | 0.31        | 0.13 |
| East Asia       | 38.61%   | 0.45        | 0.16 |
| Europe          | 59.02%   | 1.15        | 0.24 |
| North Africa    | 34.05%   | 0.69        | 0.15 |
| North America   | 49.7%    | 0.72        | 0.2  |
| Northeast Asia  | 26.32%   | 0.43        | 0.14 |
| Oceania         | 27.89%   | 0.44        | 0.14 |
| South America   | 28.08%   | 0.44        | 0.14 |
| South Asia      | 21.92%   | 0.54        | 0.13 |
| Southeast Asia  | 23.07%   | 0.29        | 0.13 |
| Southwest Asia  | 33.69%   | 0.61        | 0.15 |
| West Africa     | 22.14%   | 0.33        | 0.13 |
| West Indies     | 32.19%   | 0.32        | 0.15 |
| World           | 50.04%   | 0.88        | 0.2  |

**Table S8:** Population coverage of class II MHC specific B-cell epitopes

| Population/area | Class II |             |      |
|-----------------|----------|-------------|------|
|                 | Coverage | Average hit | pc90 |
| Central Africa  | 15.2%    | 0.17        | 0.12 |
| Central America | 12.49%   | 0.14        | 0.11 |
| East Africa     | 12.76%   | 0.17        | 0.11 |
| East Asia       | 17.28%   | 0.28        | 0.12 |
| Europe          | 36.78%   | 0.54        | 0.16 |
| North Africa    | 27.63%   | 0.3         | 0.14 |
| North America   | 31.49%   | 0.46        | 0.15 |
| Northeast Asia  | 10.91%   | 0.14        | 0.11 |
| Oceania         | 2.67%    | 0.03        | 0.1  |
| South America   | 13.17%   | 0.17        | 0.12 |
| South Asia      | 36.27%   | 0.47        | 0.16 |
| Southeast Asia  | 7.13%    | 0.08        | 0.11 |
| Southwest Asia  | 14.43%   | 0.17        | 0.12 |
| West Africa     | 12.69%   | 0.17        | 0.11 |
| West Indies     | 26.71%   | 0.37        | 0.14 |
| World           | 28.63%   | 0.41        | 0.14 |
